# Supplementary material for: Dipole-induced transitions from Schottky to Ohmic contact at Janus MoSiGeN4/metal interfaces
Source: Royal Society of Chemistry journal article supplement (doi:10.1039/d4nh00493k), 2025-01-01
Supplement: d4nh00493k1.pdf [file d4nh00493k1.pdf]

## Supporting Information

### **Dipole-induced transition from Schottky to Ohmic contact at Janus MoSiGeN<sub>4</sub>/metal interfaces**

Wen Ai,<sup>a</sup> Xiaohui Hu,<sup>a,b\*</sup> Tao Xu,<sup>c</sup> Jian Yang,<sup>a,b\*</sup> Litao Sun<sup>c</sup>

<sup>a</sup> College of Materials Science and Engineering, Nanjing Tech University, Nanjing 211816, China

<sup>b</sup> Jiangsu Collaborative Innovation Center for Advanced Inorganic Function Composites, Nanjing Tech University, Nanjing 211816, China

<sup>c</sup> SEU-FEI Nano-Pico Center, Key Laboratory of MEMS of Ministry of Education, Southeast University, Nanjing 210096, China

\* Corresponding authors. Email: xiaohui.hu@njtech.edu.cn, yangjian1976@163.com.

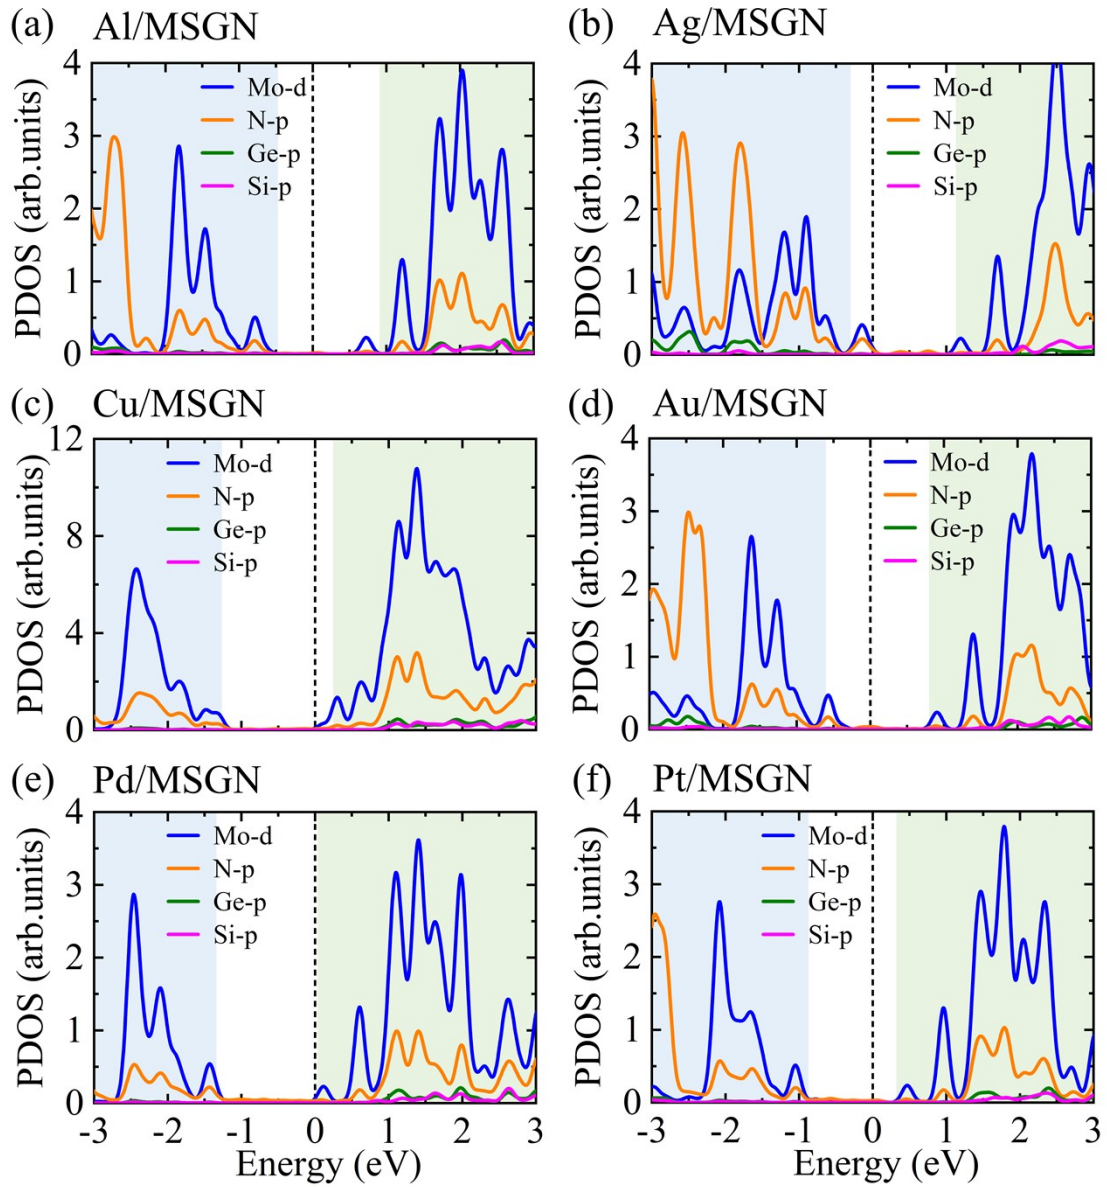

**Fig. S1** Partial density of states for (a) Al/MSGN, (b) Ag/MSGN, (c) Cu/MSGN, (d) Au/MSGN, (e) Pd/MSGN, and (f) Pt/MSGN interfaces.

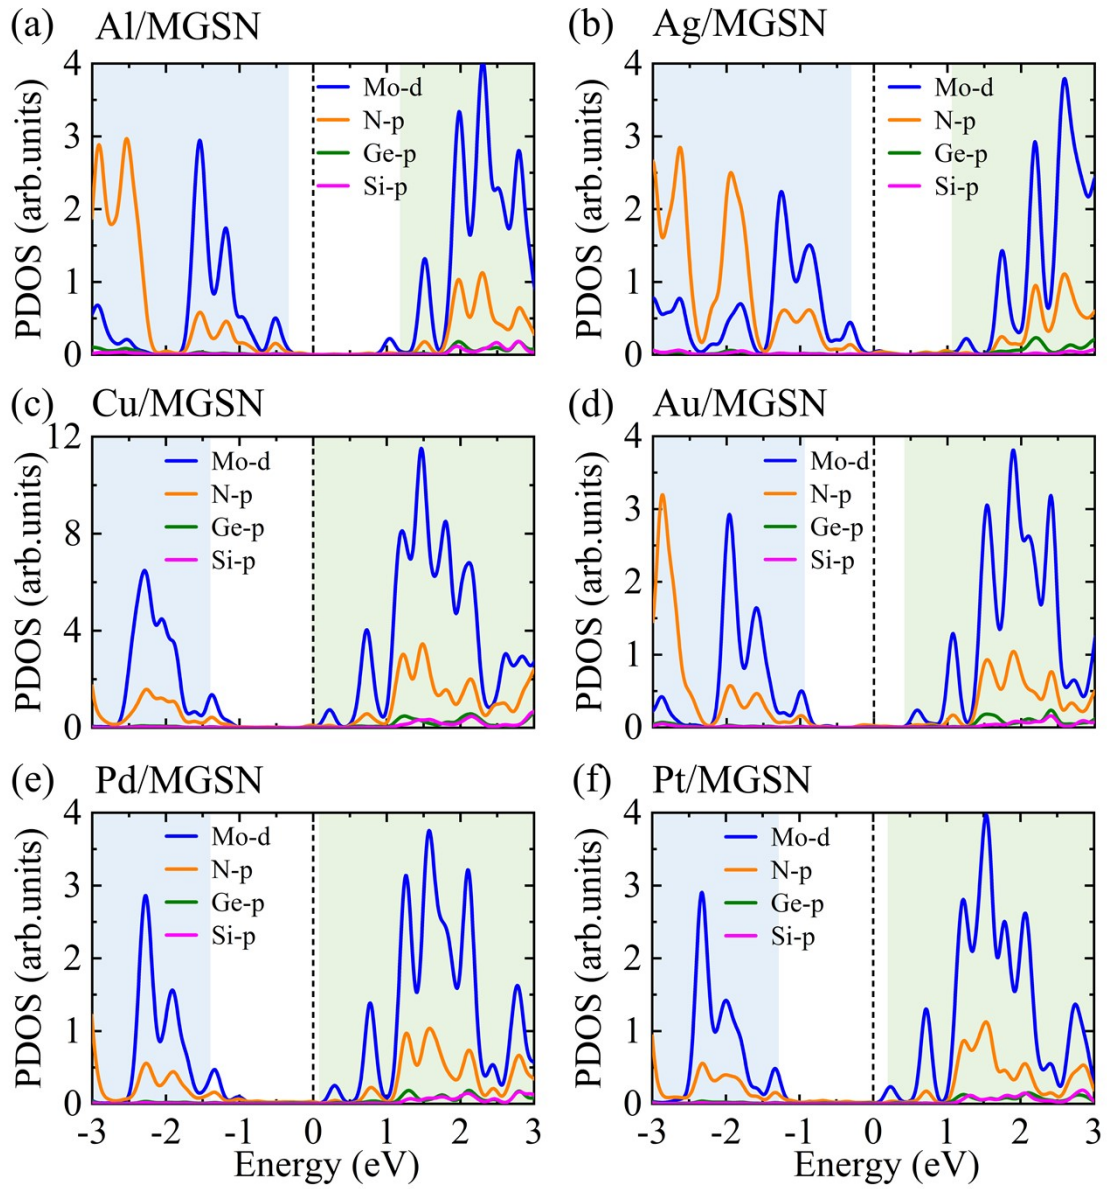

**Fig. S2** Partial density of states for (a) Al/MGSN, (b) Ag/MGSN, (c) Cu/MGSN, (d) Au/MGSN, (e) Pd/MGSN, and (f) Pt/MGSN interfaces.

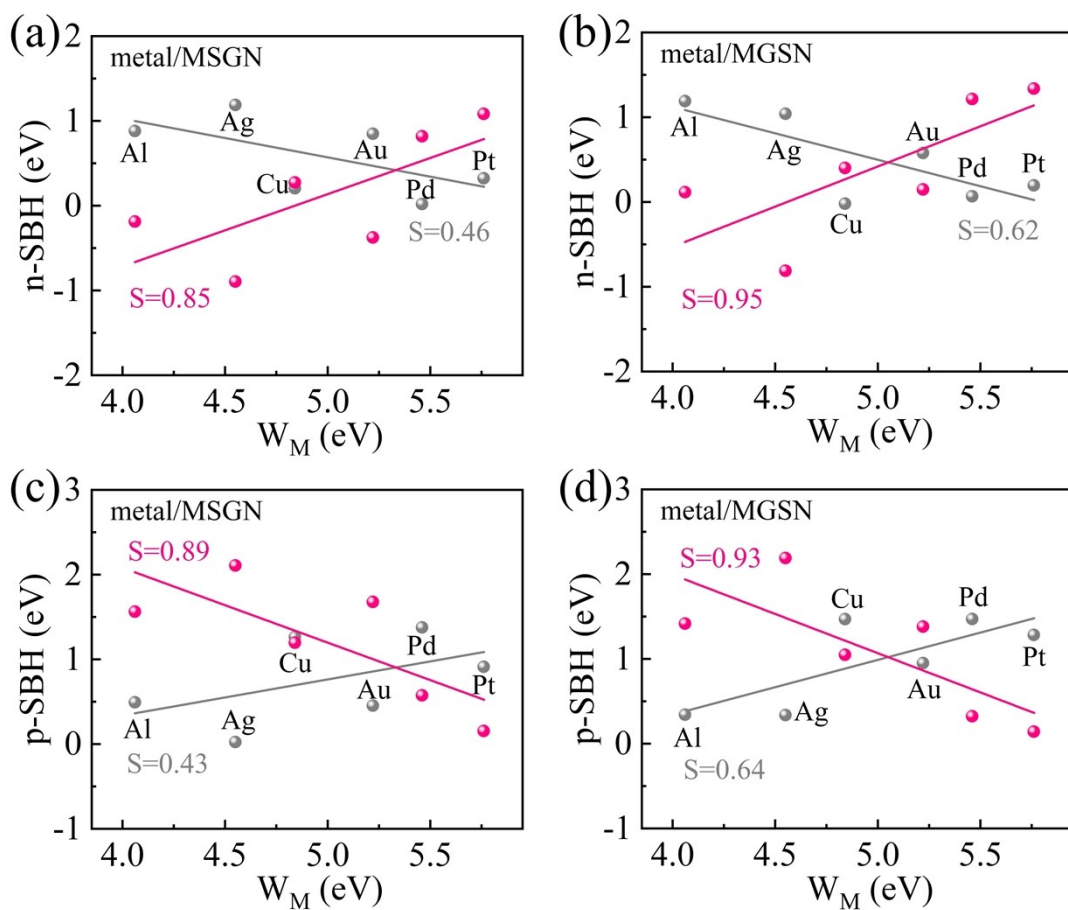

**Fig. S3** Schottky-Mott plot for (a, b) n-SBH and (c, d) p-SBH for metal/MSGN and metal/MGSN interfaces. The pink and gray lines represent the pinning factor  $S$  with and without  $\Delta V$  modified, respectively.

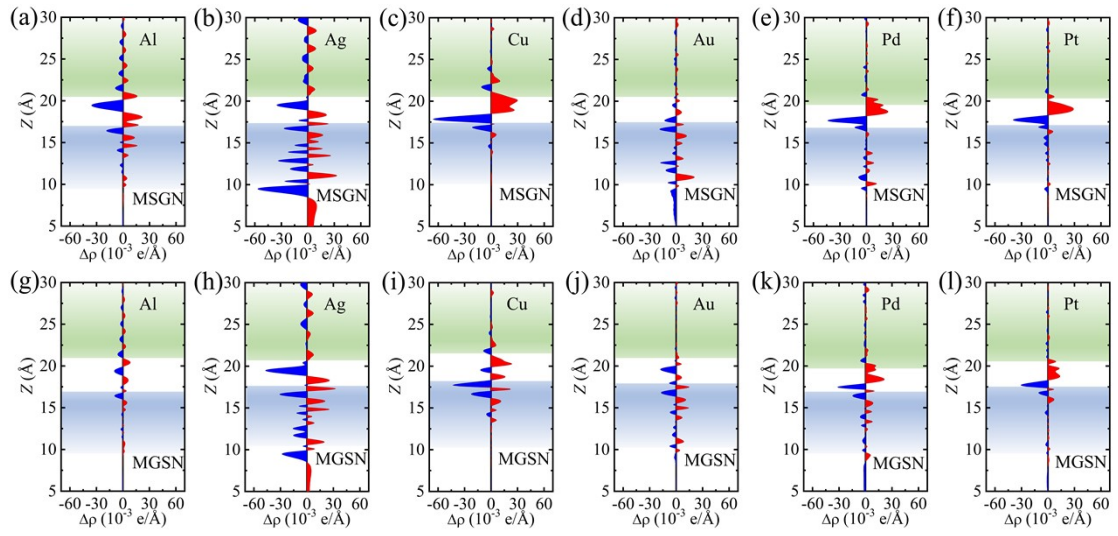

**Fig. S4** Plane-averaged differential charge density of (a) Al/MSGN, (b) Ag/MSGN, (c) Cu/MSGN, (d) Au/MSGN, (e) Pd/MSGN, (f) Pt/MSGN, (g) Al/MGSN, (h) Ag/MGSN, (i) Cu/MGSN, (j) Au/MGSN, (k) Pd/MGSN, and (l) Pt/MGSN. The red (blue) color denotes electron accumulation (depletion).

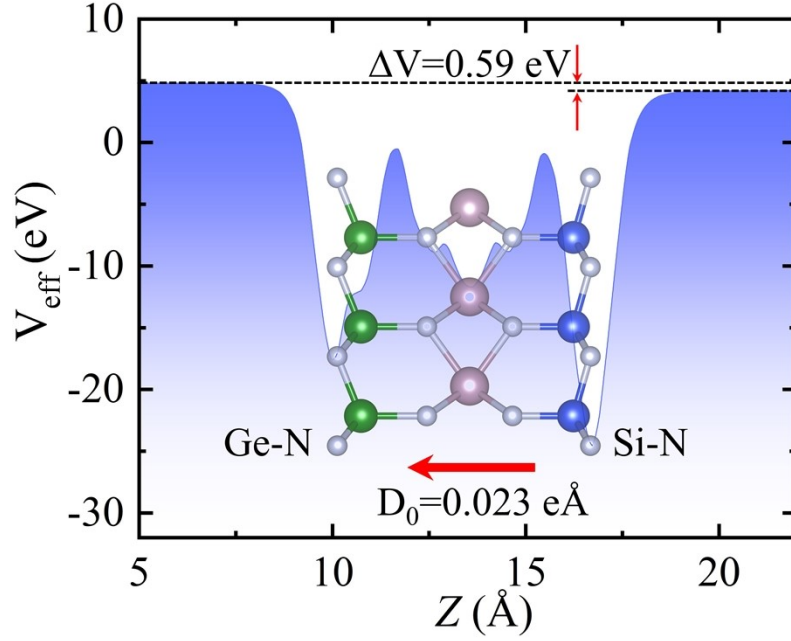

**Fig. S5** Calculated plane-averaged electrostatic potentials for MoSiGeN<sub>4</sub> monolayer. The values of the intrinsic potential step ( $\Delta V$ ) and dipoles ( $D_0$ ) for the MoSiGeN<sub>4</sub> monolayer are indicated in the figure.

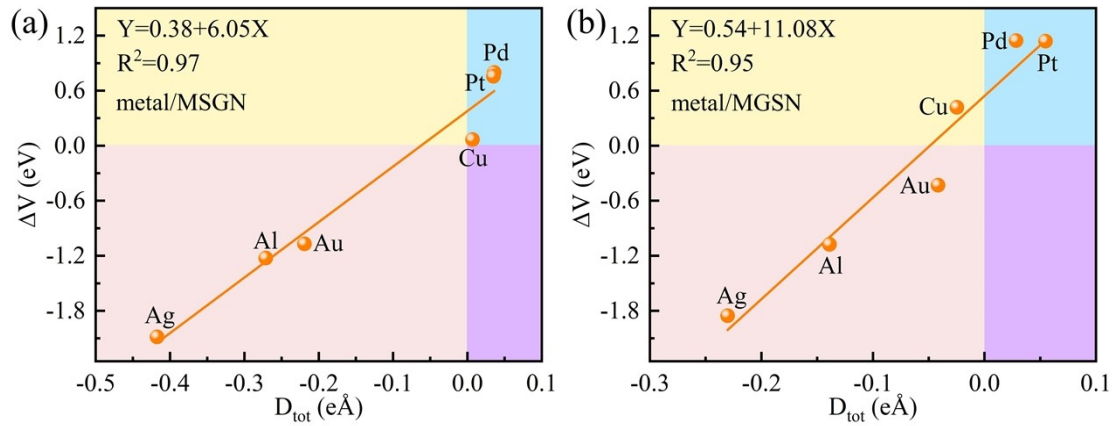

**Fig. S6** The change of  $\Delta V$  with total dipole ( $D_{tot}$ ) for (a) metal/MSGN and (b) metal/MGSN interfaces.

**Table S1** The optimized geometric parameters of Janus MoSiGeN<sub>4</sub> monolayer and MoSi<sub>2</sub>N<sub>4</sub> monolayer, including lattice constants (a, b), bond length of Ge-N ( $d_1$ ,  $d_2$ ), Mo-N ( $d_3$ ,  $d_4$ ), Si-N ( $d_5$ ,  $d_6$ ), and the thickness of the Janus MoSiGeN<sub>4</sub> monolayer and MoSi<sub>2</sub>N<sub>4</sub> monolayer ( $d_t$ ).

| Material                         | a (Å) | $d_1$ (Å) | $d_2$ (Å) | $d_3$ (Å) | $d_4$ (Å) | $d_5$ (Å) | $d_6$ (Å) | $d_t$ (Å) |
|----------------------------------|-------|-----------|-----------|-----------|-----------|-----------|-----------|-----------|
| MoSiGeN <sub>4</sub>             | 2.96  | 1.841     | 1.885     | 2.106     | 2.108     | 1.748     | 1.777     | 7.261     |
| MoSi <sub>2</sub> N <sub>4</sub> | 2.91  | 1.755     | 1.747     | 2.096     | 2.096     | 1.747     | 1.755     | 7.012     |

**Table S2** The lattice mismatch ( $\delta$ ) between MoSiGeN<sub>4</sub> and bulk metals. The work function of 2D metals without strain ( $W_M$ ) and under strain ( $W_{M-S}$ ).

| metal          | Al   | Ag   | Cu   | Au   | Pd   | Pt   |
|----------------|------|------|------|------|------|------|
| $\delta$ (%)   | 3.53 | 0.59 | 1.56 | 2.63 | 5.61 | 5.07 |
| $W_M$ (eV)     | 4.06 | 4.55 | 4.84 | 5.22 | 5.46 | 5.76 |
| $W_{M-S}$ (eV) | 4.11 | 4.46 | 4.81 | 5.27 | 5.24 | 5.60 |

**Table S3** The minimum ELF value at the center of the line profile curves for metal/MoSiGeN<sub>4</sub> interfaces.

| ELF | Si-N side | Ge-N side |
|-----|-----------|-----------|
| Al  | 0.039     | 0.046     |
| Ag  | 0.042     | 0.042     |
| Cu  | 0.049     | 0.055     |
| Au  | 0.039     | 0.046     |
| Pd  | 0.058     | 0.057     |
| Pt  | 0.052     | 0.055     |

**Table S4** The values of the n-SBH, p-SBH,  $W_M$ ,  $E_f$ ,  $\Delta V$ ,  $V_0$ ,  $V_{\text{int}}$ ,  $D_{\text{tot}}$ ,  $D_0$ ,  $\Delta D$ ,  $d$ ,  $E_b$ , and  $Q$  for the metal/MoSiGeN<sub>4</sub> interfaces.

| Systems | n-SBH   | p-SBH  | $W_M$  | $E_f$   | $\Delta V$ | $V_0$   | $V_{\text{int}}$ | $D_{\text{tot}}$ | $D_0$   | $\Delta D$ | $d$    | $E_b$   | $Q$     |
|---------|---------|--------|--------|---------|------------|---------|------------------|------------------|---------|------------|--------|---------|---------|
| Al-MSGN | 0.8825  | 0.4945 | 4.0600 | 3.7030  | -1.0689    | -0.5100 | -0.5589          | -0.2194          | -0.0229 | -0.1965    | 3.4430 | -0.2011 | 0.0297  |
| Ag-MSGN | 1.1893  | 0.0252 | 4.5500 | 0.9090  | -2.0838    | -0.5100 | -1.5738          | -0.4176          | -0.0229 | -0.3947    | 3.0540 | -0.6057 | 0.0599  |
| Cu-MSGN | 0.2067  | 1.2655 | 4.8360 | -0.9260 | 0.0677     | -0.5100 | 0.5777           | 0.0068           | -0.0229 | 0.0297     | 3.1371 | -0.3545 | 0.0095  |
| Au-MSGN | 0.8490  | 0.4549 | 5.2220 | -0.1740 | -1.2232    | -0.5100 | -0.7132          | -0.2713          | -0.0229 | -0.2484    | 3.1469 | -0.4234 | 0.0154  |
| Pd-MSGN | 0.0205  | 1.3767 | 5.4600 | -1.1730 | 0.8000     | -0.5100 | 1.3100           | 0.0359           | -0.0229 | 0.0588     | 2.6718 | -0.3921 | -0.0054 |
| Pt-MSGN | 0.3252  | 0.9138 | 5.7620 | -1.6610 | 0.7583     | -0.5100 | 1.2683           | 0.0349           | -0.0229 | 0.0578     | 2.9693 | -0.3801 | -0.0187 |
| Al-MGSN | 1.1908  | 0.3437 | 4.0600 | 2.5130  | -1.0747    | 0.5100  | -1.5847          | -0.1391          | 0.0229  | -0.1620    | 3.2618 | -0.1697 | 0.0402  |
| Ag-MGSN | 1.0414  | 0.3392 | 4.5500 | -0.0930 | -1.8519    | 0.5100  | -2.3619          | -0.2304          | 0.0229  | -0.2533    | 2.9322 | -0.5146 | 0.0789  |
| Cu-MGSN | -0.0185 | 1.4703 | 4.8360 | 1.0520  | 0.4205     | 0.5100  | -0.0895          | -0.0248          | 0.0229  | -0.0477    | 3.1402 | -0.3468 | 0.0708  |
| Au-MGSN | 0.5788  | 0.9518 | 5.2220 | 1.2990  | -0.4297    | 0.5100  | -0.9397          | -0.0417          | 0.0229  | -0.0646    | 2.9896 | -0.3506 | 0.0335  |
| Pd-MGSN | 0.0689  | 1.4714 | 5.4600 | 1.2290  | 1.1463     | 0.5100  | 0.6363           | 0.0284           | 0.0229  | 0.0054     | 2.6675 | -0.3840 | 0.0309  |
| Pt-MGSN | 0.1976  | 1.2846 | 5.7620 | 1.8490  | 1.1412     | 0.5100  | 0.6312           | 0.0547           | 0.0229  | 0.0318     | 2.8791 | -0.3734 | 0.0045  |



**Table S5** The tunnel barriers height ( $\Phi_{\text{TB}}$ ), tunnel barrier width ( $D_{\text{TB}}$ ), tunneling probability (TP), and the tunneling specific resistivity ( $\rho_t$ ) for metal/MGSN (Ge-N) and

|    | $\Phi_{\text{TB}}$ (eV) |      | $D_{\text{TB}}$ (Å) |      | TP (%) |       | $\rho_t$ ( $10^{-9} \Omega \cdot \text{cm}^2$ ) |       |
|----|-------------------------|------|---------------------|------|--------|-------|-------------------------------------------------|-------|
|    | Si-N                    | Ge-N | Si-N                | Ge-N | Si-N   | Ge-N  | Si-N                                            | Ge-N  |
| Al | 3.13                    | 3.34 | 1.69                | 1.61 | 14.20  | 14.64 | 1.865                                           | 1.689 |
| Ag | 3.35                    | 3.60 | 1.43                | 1.28 | 18.11  | 20.49 | 1.421                                           | 1.310 |
| Cu | 3.47                    | 3.87 | 1.46                | 1.56 | 16.96  | 13.50 | 1.427                                           | 1.600 |
| Au | 4.41                    | 3.85 | 1.61                | 1.34 | 11.01  | 17.99 | 1.834                                           | 1.242 |
| Pd | 2.79                    | 3.50 | 0.92                | 0.95 | 36.68  | 31.32 | 0.056                                           | 0.066 |
| Pt | 3.78                    | 2.62 | 1.28                | 0.94 | 19.68  | 37.01 | 1.236                                           | 0.058 |

metal/MSGN (Si-N) interfaces.
